# Supplementary material for: Multimodal evaluation of an interphotoreceptor retinoid-binding protein-induced mouse model of experimental autoimmune uveitis
Source: PubMed Central journal article supplement (PMC8979956; doi:10.1038/s12276-022-00733-z), 2022-03-09
Supplement: 12276_2022_733_MOESM1_ESM.pdf [file 12276_2022_733_MOESM1_ESM.pdf]

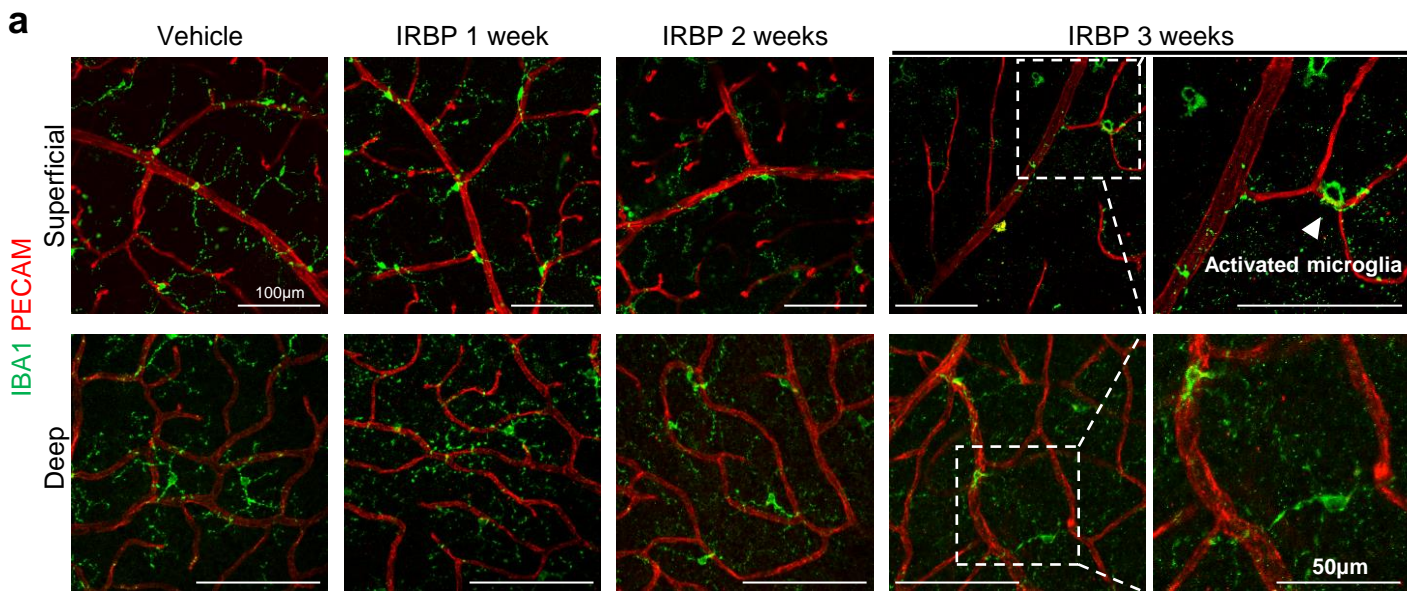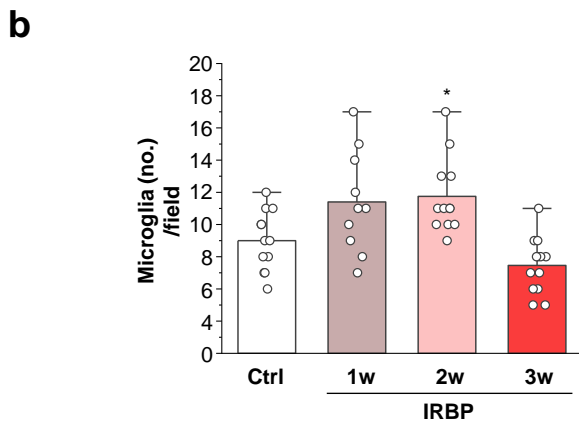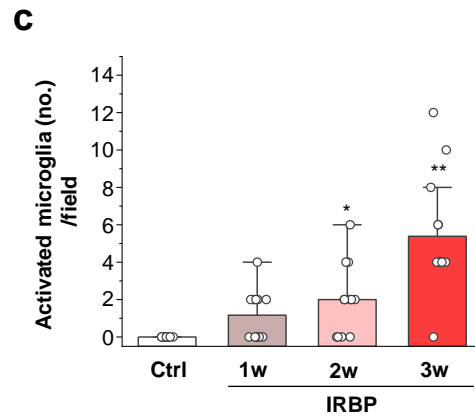

**Supplementary Fig. 1. Serial images of whole-mounted retina showing changes of the microglia activation in the superficial and deep vascular layer after interphotoreceptor retinoid-binding protein immunization. (a)** Confocal images of the whole-mounted retina. **(b)** Quantifications ( $n = 6-12$  retinas per group) of the number of the total microglia and **(c)** activated microglia in superficial and deep vascular layer by analyzing 3D rendering images with high-resolution Z stacks (supplementary video 1 and 2). Scale bars, 100  $\mu\text{m}$ . \* $P < 0.05$  \*\* $P < 0.01$  compared to controls.

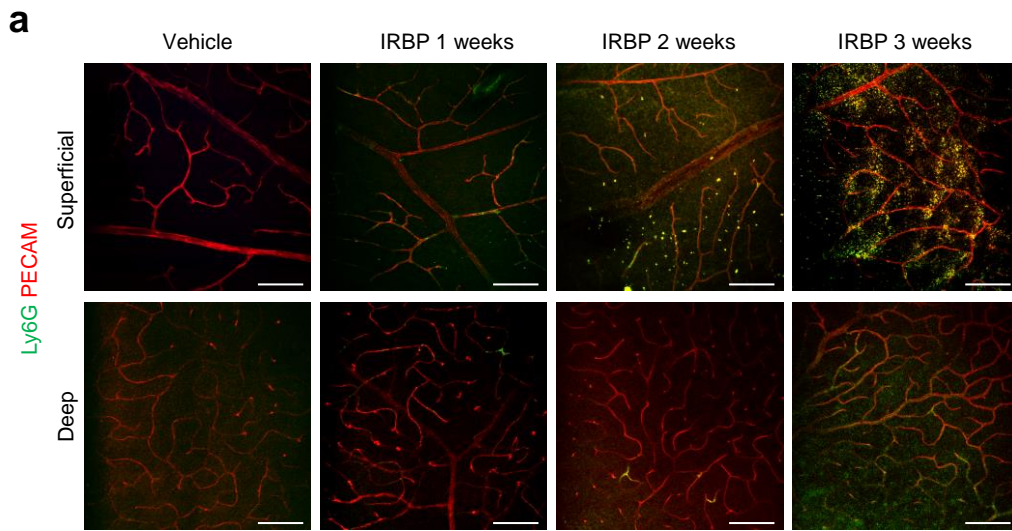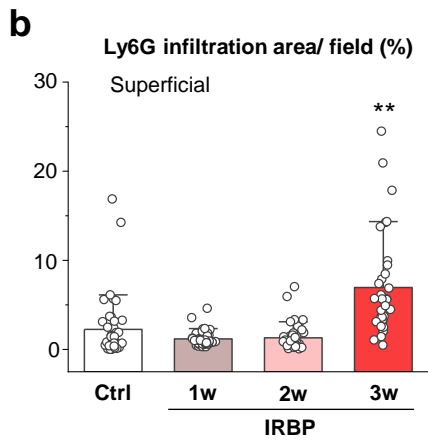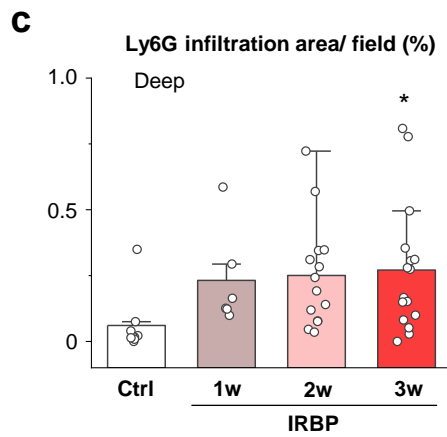

**Supplementary Fig. 2. Serial images of whole-mounted retina showing changes of the neutrophil infiltration in the superficial and deep vascular layer after interphotoreceptor retinoid-binding protein immunization. (a) Confocal images of the whole-mounted retina and (b, c) its quantifications in each layers (n= above 10 retinas per group). Scale bars, 100  $\mu$ m. \* $P$  < 0.05 \*\*  $P$  < 0.01 compared to controls.**

**a** IRBP 3 weeks

IRBP + minocycline

CX3CR1-GFP PECAM

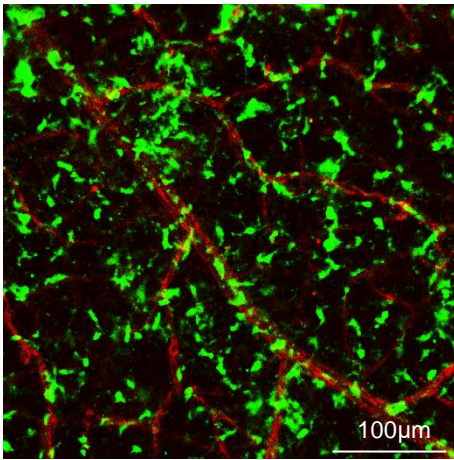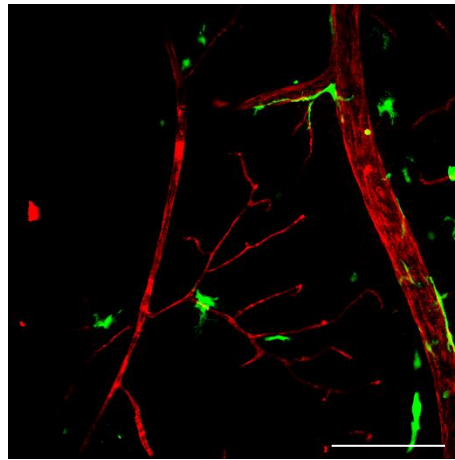

Superficial

**b** IRBP 3 weeks

IRBP + Ly6G ab

LysM-GFP PECAM

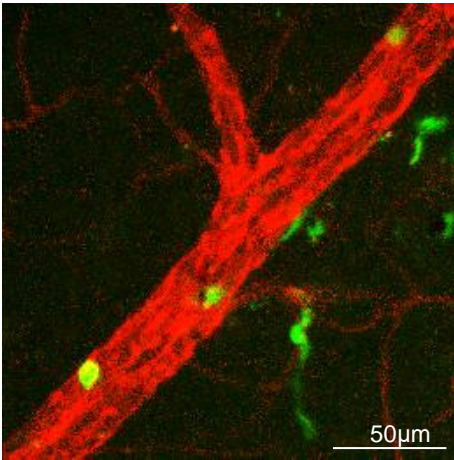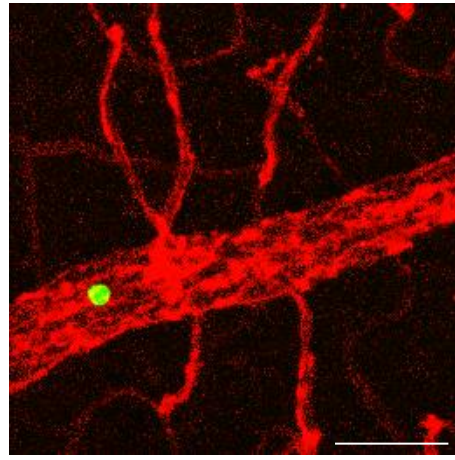

Superficial

**Supplementary Fig. 3. Validation of minocycline-induced microglial suppression and Ly6G-induced inhibition of neutrophil infiltration. (a)** Confocal images of the whole-mounted retina of the experimental autoimmune uveitis (EAU) mouse with and without minocycline injection. **(b)** Confocal images of the whole-mounted retina of the EAU mouse with and without Ly6G injection. Scale bars, 100  $\mu\text{m}$ .
